Carpentier et al. Vol. 122, No. 6, September 1993. Pages 1243–1252.

Due to an editorial error, Jonathan Baecker's name was misspelled in the author line, the acknowledgments, and the present address footnote. The correct spelling should be Jonathan Backer throughout this article.

---
